# Supplementary material
Source: ML conference proceedings conference paper supplement (https://proceedings.mlr.press/v38/lakshminarayanan15.html)
Supplement: Supplementary file [file lakshminarayanan15-supp.pdf]

# Particle Gibbs for Bayesian Additive Regression Trees

## Supplementary Material

### A Results on hypercube- $D$ dataset

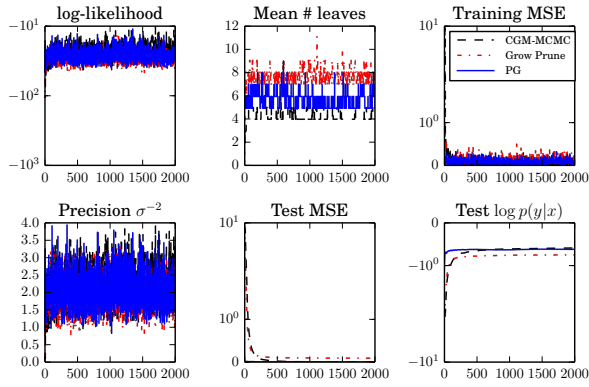

Figure 4: Results on Hypercube-2 dataset.

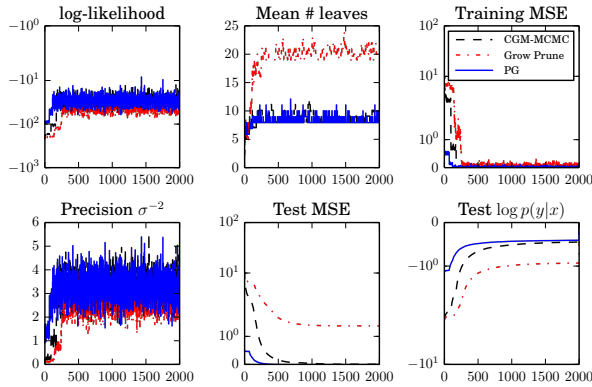

Figure 5: Results on Hypercube-3 dataset.
